# Supplementary material for: Coumarin–hemicyanine conjugates as novel reaction-based sensors for cyanide detection: convenient synthesis and ICT mechanism
Source: Royal Society of Chemistry journal article supplement (doi:10.1039/c4ra01598c), 2014-01-01
Supplement: c4ra01598c1.pdf [file c4ra01598c1.pdf]

## Supporting Information

### Coumarin-hemicyanine conjugates as novel reaction-based sensors for cyanide detection: convenient synthesis and ICT mechanism

Meng-Jiao Peng,<sup>a</sup> Yuan Guo,<sup>\* [a, b]</sup> Xiao-Feng Yang,<sup>a</sup> Franck Suzenet,<sup>b</sup> Jin Li,<sup>a</sup> Chang-Wei Li<sup>a</sup> and Yu-Wei Duan<sup>a</sup>

<sup>a</sup>Key laboratory of synthetic and natural functional molecular of chemistry of the ministry of education, College of chemistry and materials science, Northwest University, 229 Taibai Road(North), Xi'an 710069, P. R. China.

<sup>b</sup>Institut de Chimie Organique et Analytique, Université d'Orléans, 45067 Orléans cedex 2, France

#### Contents:

ESI 1. NMR spectra of the sensors

ESI 2. Mass spectra of the sensors

ESI 3. IR of the sensors

ESI 4. Absorption responses of the sensors toward cyanide

#### ESI 1. NMR spectra of the sensors

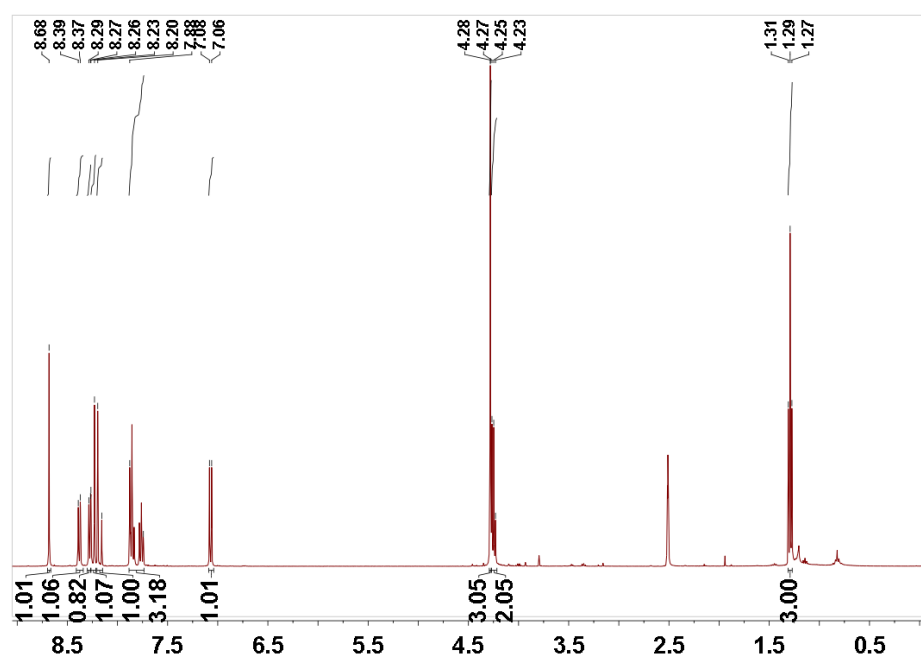

Fig.S1 <sup>1</sup>H NMR charts of COC-1 in DMSO-d<sub>6</sub>-CF<sub>3</sub>COOD

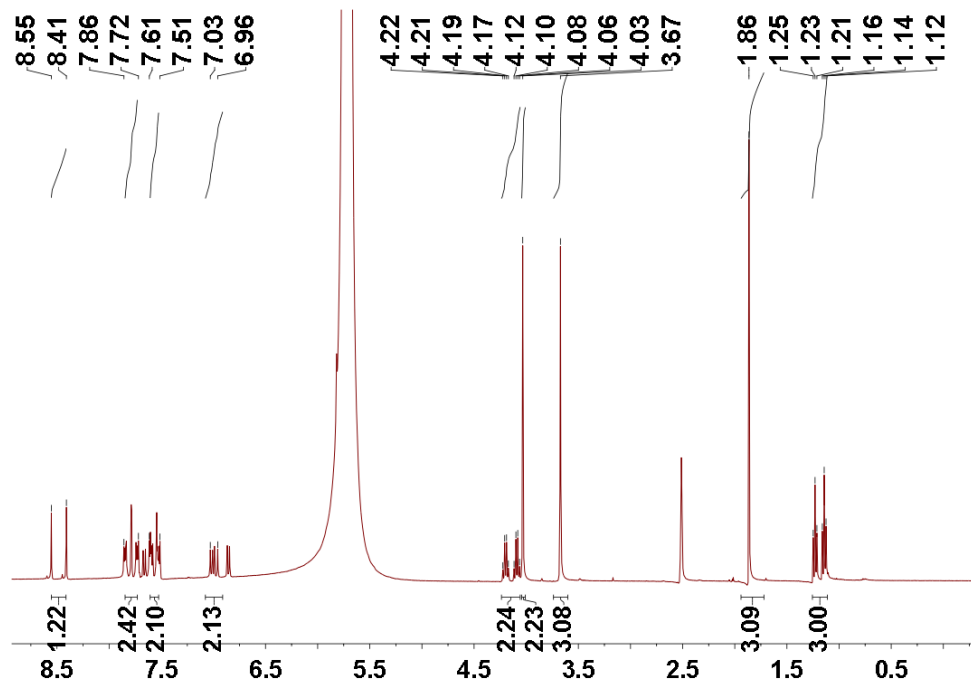

Fig.S2 <sup>1</sup>H NMR charts of COC-2 in DMSO-d<sub>6</sub>-CF<sub>3</sub>COOD

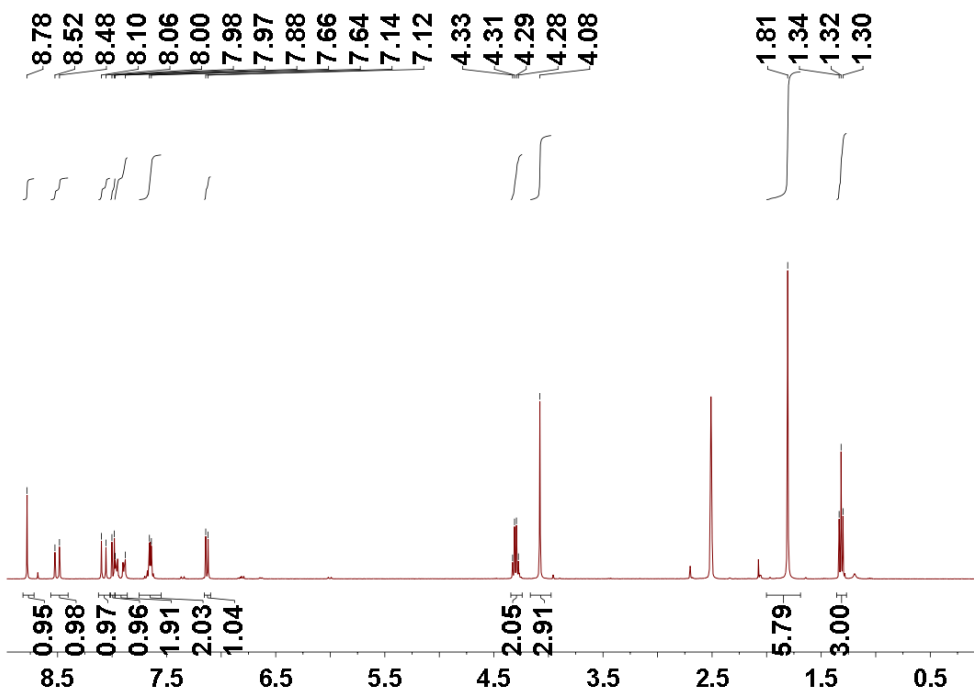

Fig.S3 <sup>1</sup>H NMR charts of COC-3 in DMSO-d<sub>6</sub>-CF<sub>3</sub>COOD

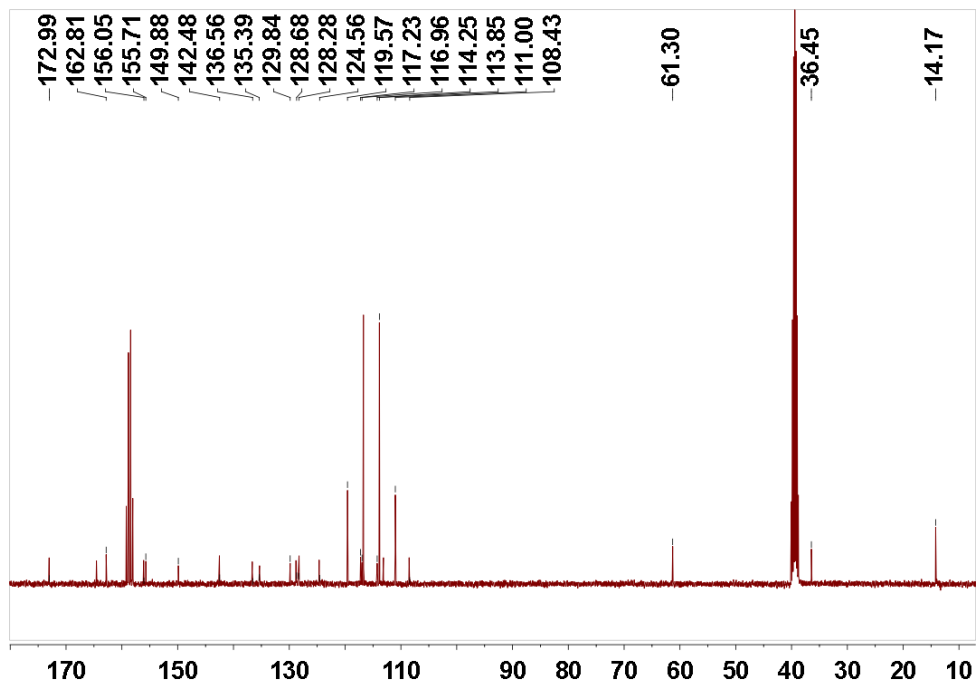

Fig.S4  $^{13}\text{C}$  NMR charts of COC-1 in  $\text{DMSO-d}_6\text{-CF}_3\text{COOD}$

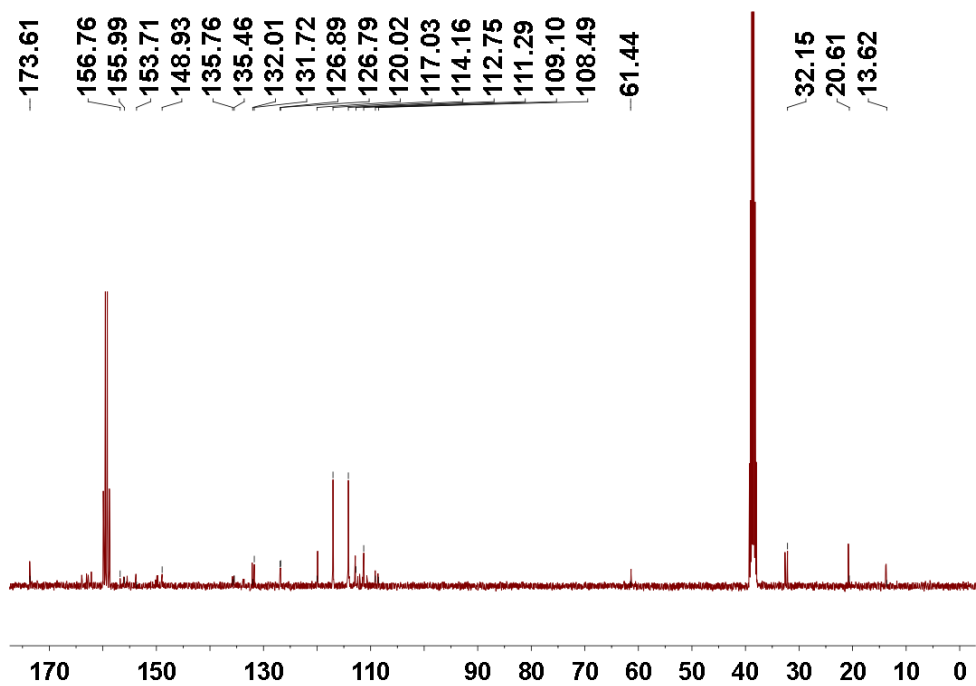

Fig.S5  $^{13}\text{C}$  NMR charts of COC-2 in  $\text{DMSO-d}_6\text{-CF}_3\text{COOD}$

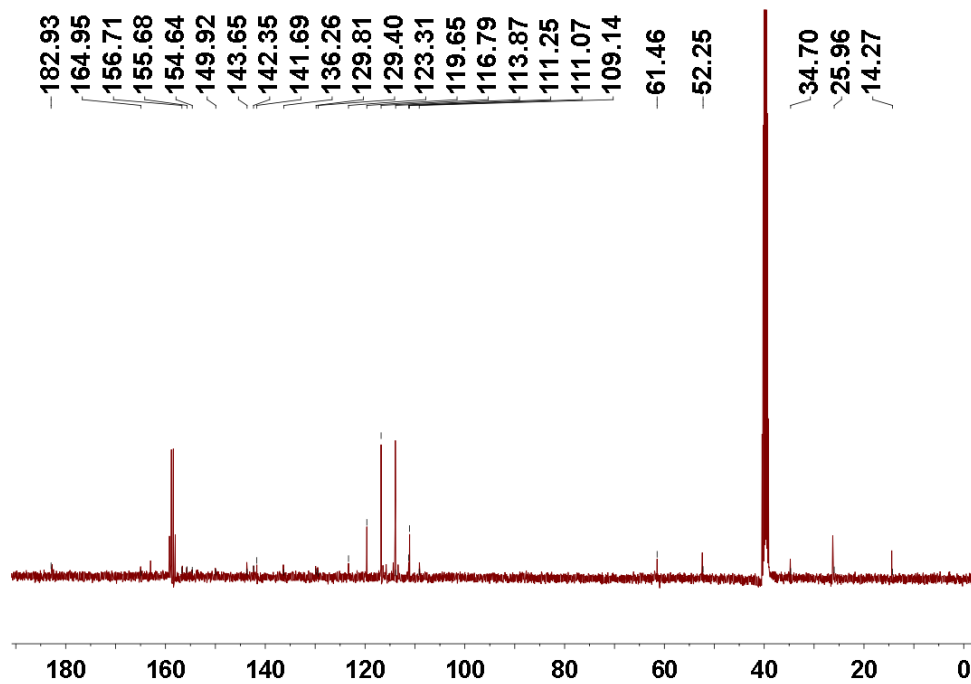

Fig.S6  $^{13}\text{C}$  NMR charts of COC-3 in  $\text{DMSO-d}_6\text{-CF}_3\text{COOD}$

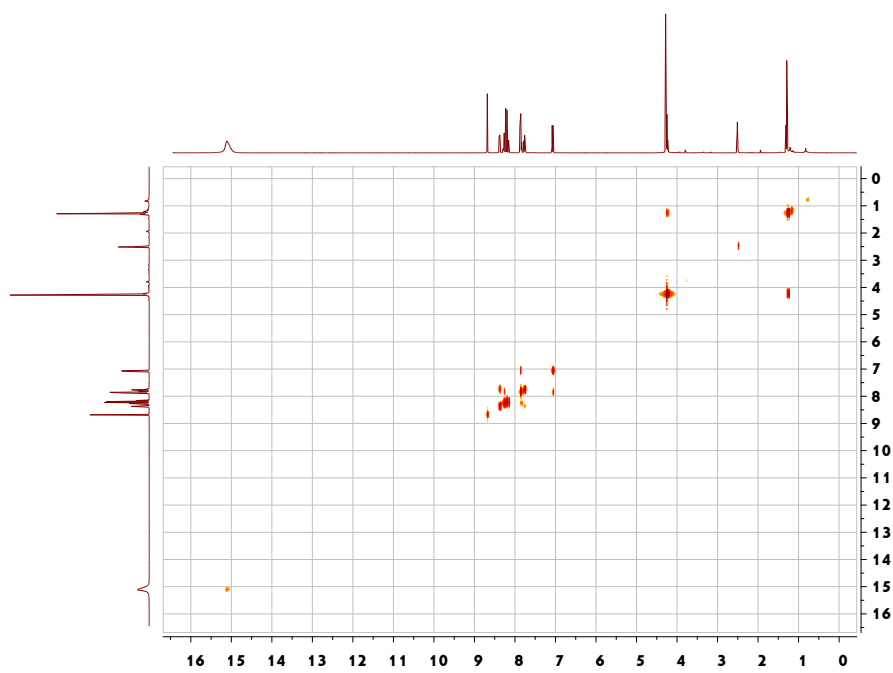

Fig.S7  $^1\text{H}$ - $^1\text{H}$  COSY of COC-1

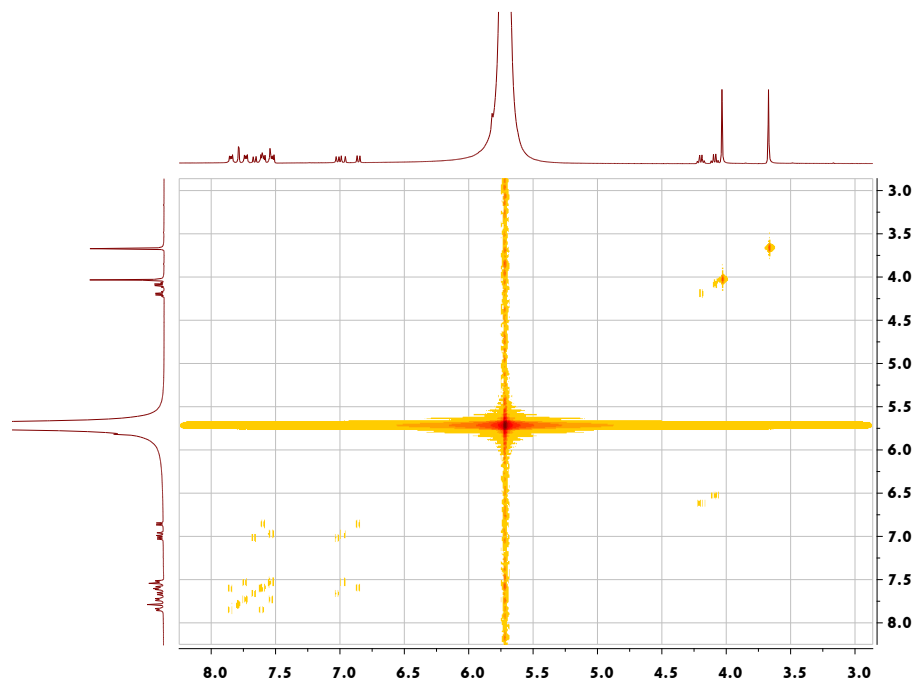

Fig.S8  $^1\text{H}$ - $^1\text{H}$  COSY of COC-2

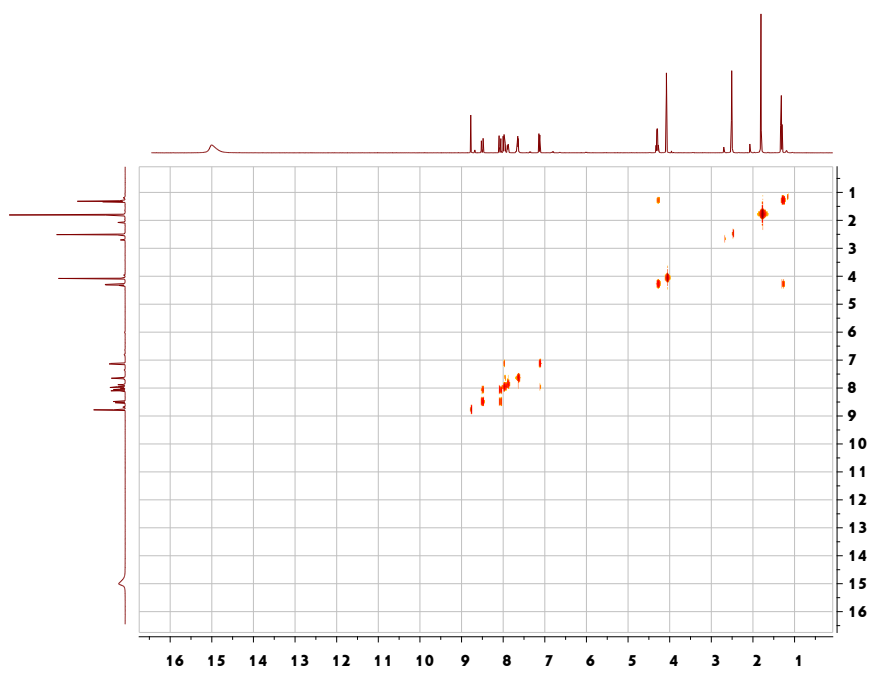

Fig.S9  $^1\text{H}$ - $^1\text{H}$  COSY of COC-3

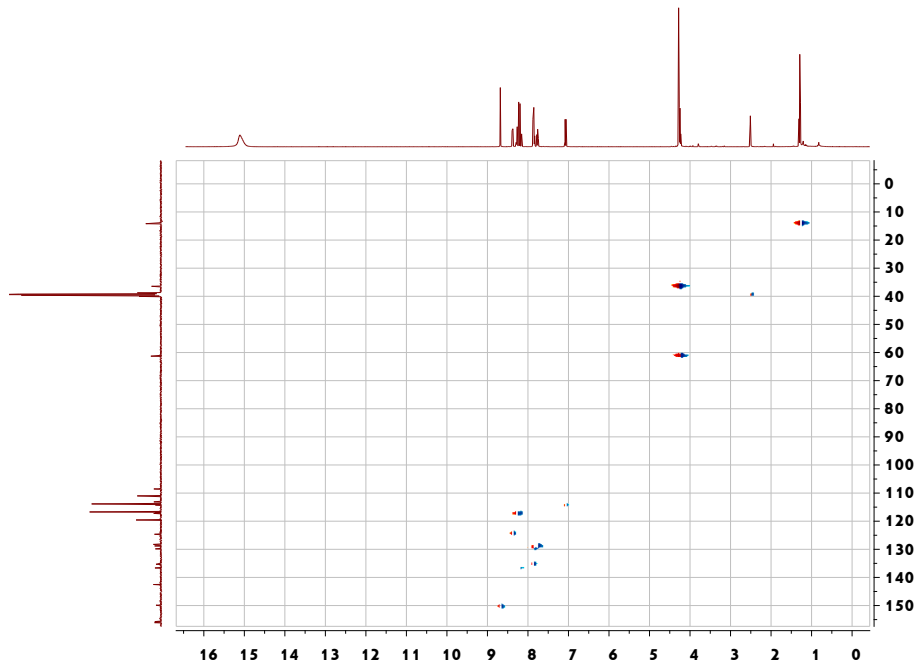

Fig.S10 HSQC of COC-1

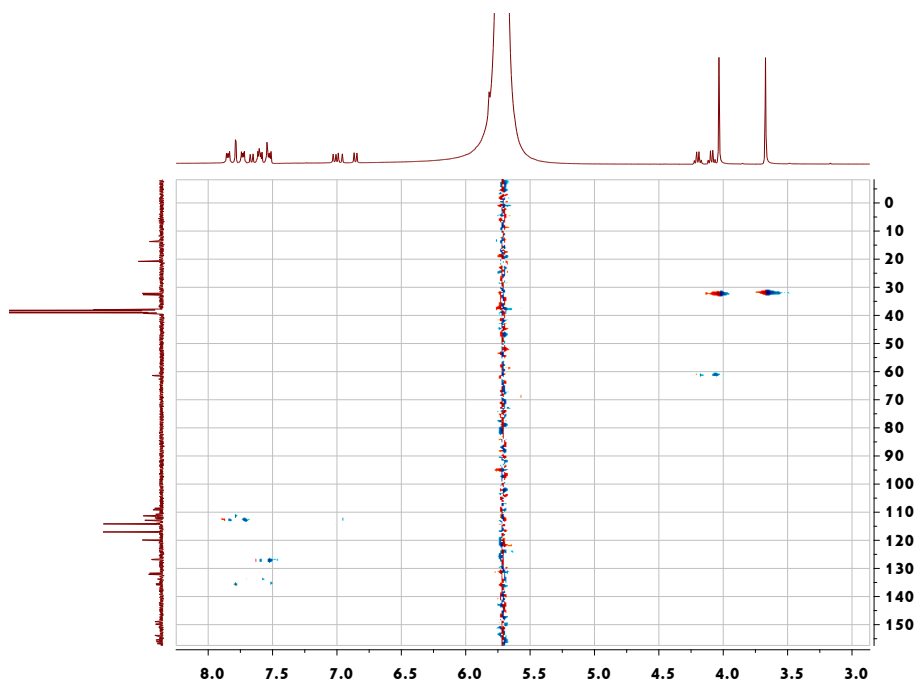

Fig.S11 HSQC of COC-2

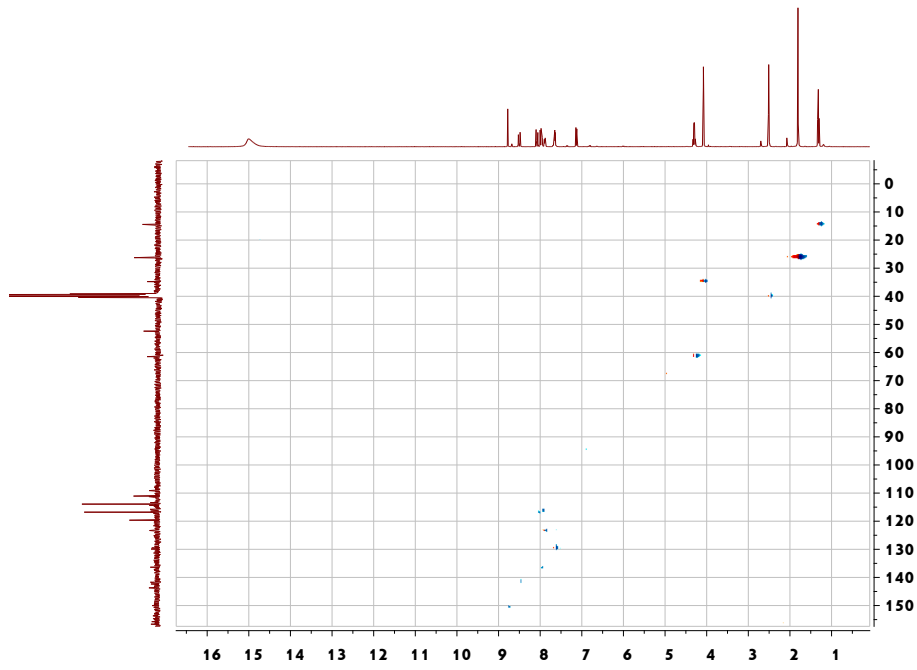

Fig.S12 HSQC of COC-3

## ESI 2. Mass spectra of the sensors

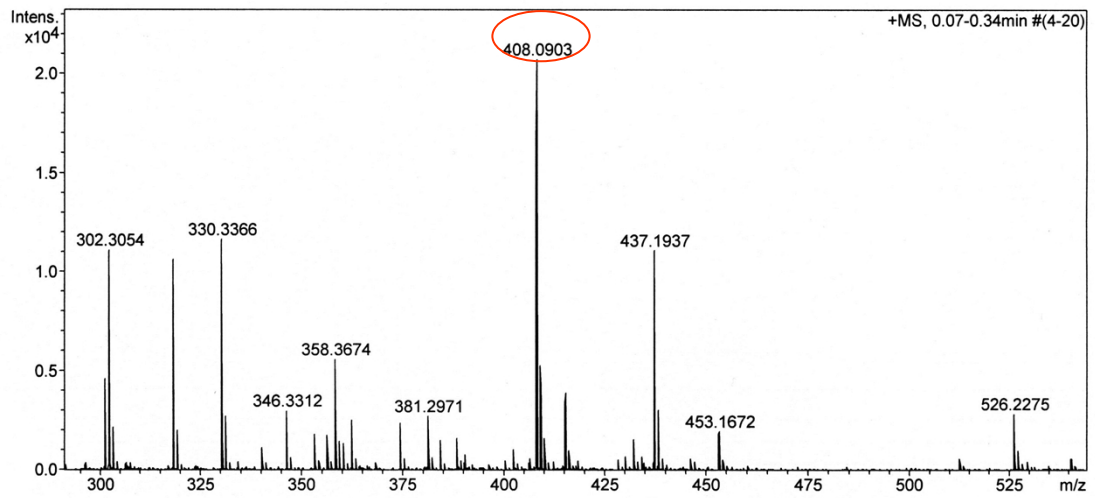

Fig. S13 The HRMS for COC-1

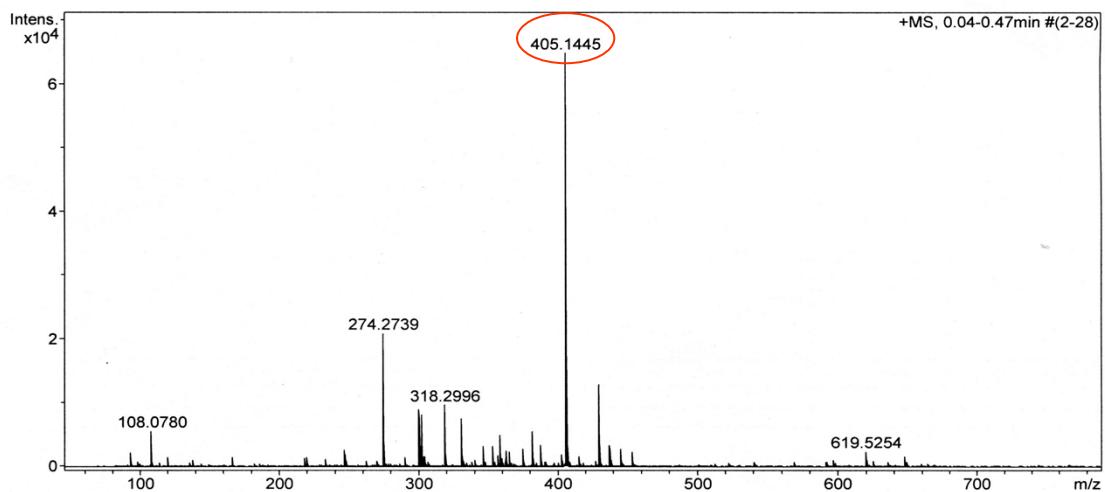

Fig. S14 The HRMS for COC-2

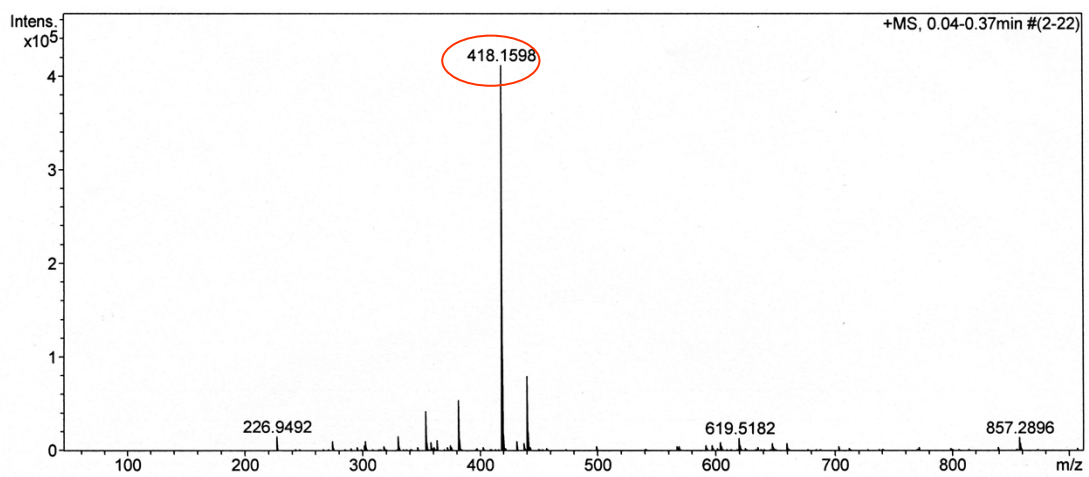

Fig. S15 The HRMS for COC-3



### ESI 3. IR of the sensors

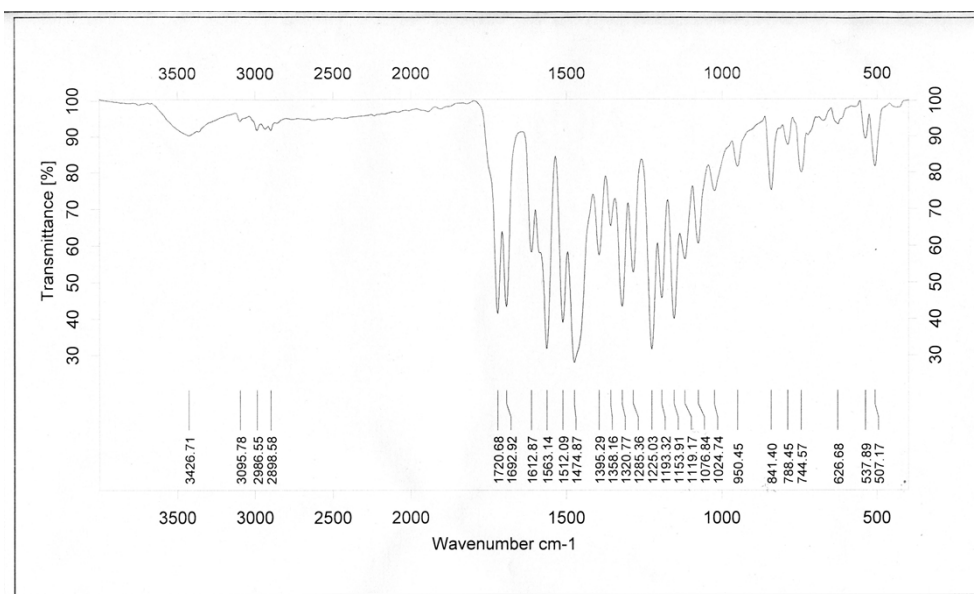

**Fig. S16** The IR spectrum of COC-1

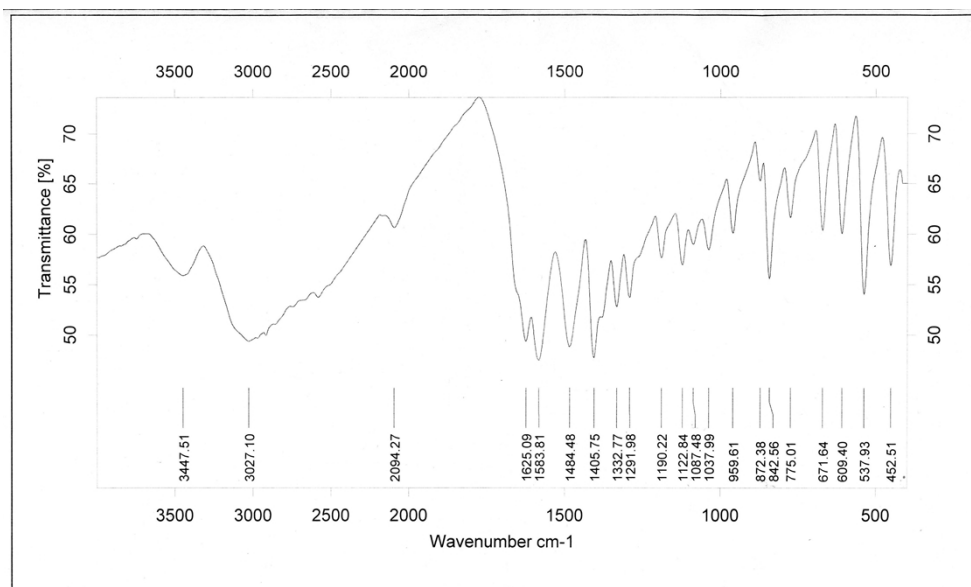

**Fig. S17** The IR spectrum of COC-2

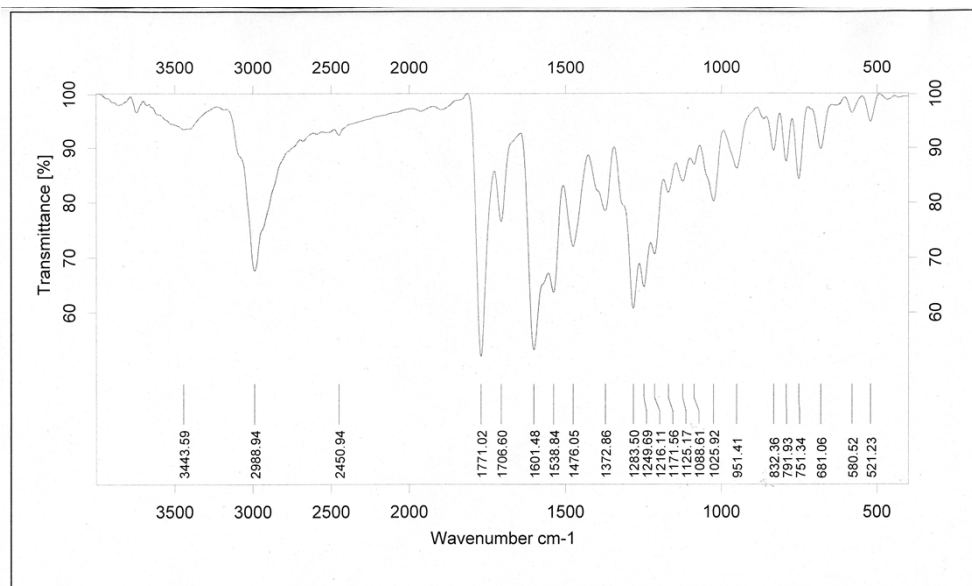

**Fig. S18** The IR spectrum of COC-3

#### ESI 4. Absorption responses of the sensors toward cyanide

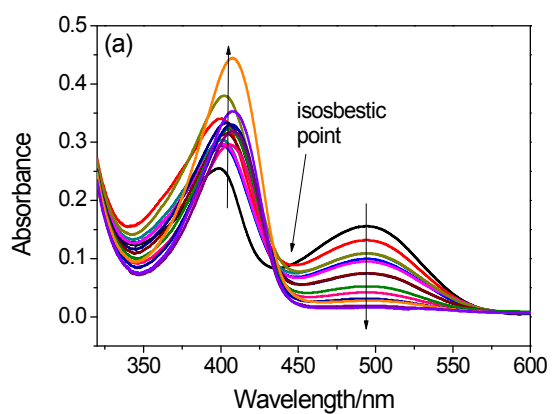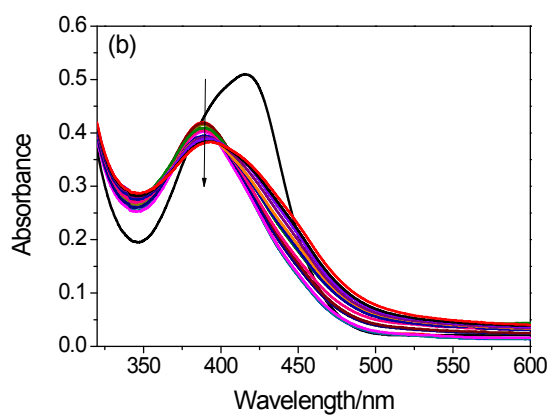

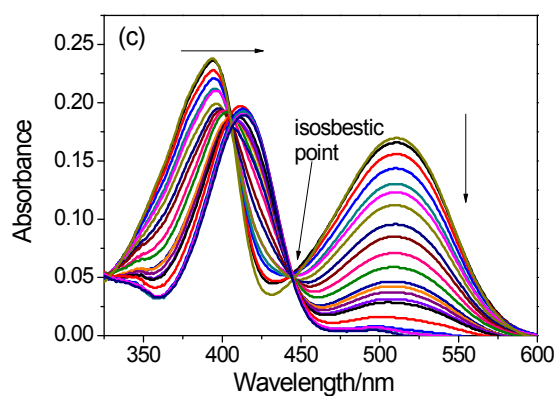

**Fig. 4.** Changes in absorption spectra of the sensors measured upon addition of  $\text{CN}^-$ . (a) **COC-1** ( $10 \mu\text{M}$ ); Cyanide concentration ( $\mu\text{M}$ ): 0, 5, 50, 90, 100, 200, 300, 400, 500, 600, 700, 800, 900, 1000, respectively; MeCN-buffer ( $\text{Na}_2\text{CO}_3$ - $\text{NaHCO}_3$ , 10.0 mM, pH = 9.4, 1 : 1, v/v); (b) **COC-2** ( $10 \mu\text{M}$ ); Cyanide concentration ( $\mu\text{M}$ ): 0, 100, 1000, 3000, 5000, 7000, 9000, 10000, 15000, 20000, 25000, 30000, 35000, 40000, 45000, 50000, respectively; MeCN-buffer ( $\text{Na}_2\text{CO}_3$ - $\text{NaHCO}_3$ , 10.0 mM, pH = 9.4, 1 : 1, v/v); (c) **COC-3** ( $5 \mu\text{M}$ ); Cyanide concentration ( $\mu\text{M}$ ): 0, 10, 20, 40, 60, 80, 95, 150, 200, 300, 400, 500, 600, 700, 900, 1000, 2000, 4000, 6000, 10000, respectively; MeOH-buffer ( $\text{Na}_2\text{CO}_3$ - $\text{NaHCO}_3$ , 10.0 mM, pH = 9.4, 1 : 1, v/v).
